# Supplementary material for: Chronic Non-cancer Pain Management in a Tertiary Pain Clinic Network: a Retrospective Study
Source: Springer Nature journal article supplement (doi:10.1007/s40122-022-00446-1), 2022-10-17
Supplement: MOESM1 [file 23611976]

# **Chronic non-cancer pain management in tertiary pain clinic's network. A retrospective study**

## **AUTHORS**

Roberto Latina<sup>1</sup>, Giustino Varrassi<sup>2</sup>, Ettore Di Biagio<sup>3</sup>, Diana Giannarelli<sup>4</sup>, Francesco Gravante<sup>5</sup>, Antonella Paladini<sup>6</sup>, Daniela D'Angelo<sup>7</sup>, Laura Iacorossi<sup>8</sup>, Cristina Martella<sup>9</sup>, Rosaria Alvaro<sup>10</sup>, Dhurata Ivziku<sup>11</sup>, Nicola Veronese<sup>1</sup>, Mario Barbagallo<sup>1</sup>, Anna Marchetti<sup>12</sup>, Paolo Notaro<sup>13</sup>, Irene Terrenato<sup>14</sup>, Gianfranco Tarsitani<sup>15</sup>, Maria Grazia De Marinis<sup>16</sup>

## **AFFILIATIONS OF AUTHORS**

Roberto Latina<sup>1</sup>

<sup>1</sup> Department of Health Promotion Science, Maternal and Infant Care, Internal Medicine, and Medical Specialities (PROMISE), University of Palermo, Palermo, Italy. E-mail: roberto.latina@unipa.it

Giustino Varrassi<sup>2</sup>

<sup>2</sup> Paolo Procacci Foundation, Rome, Italy. E-mail: giuvarr@gmail.com

Ettore Di Biagio<sup>3</sup>

<sup>3</sup> Dental Clinic, Rome, Italy. E-mail: edibiaglio@live.it

Diana Giannarelli<sup>4</sup>,

<sup>4</sup> Facility of Epidemiology and Biostatistics, IRCCS Policlinico Gemelli, Rome, Italy. E-mail: diana.giannarelli@policlinicogemelli.it

Francesco Gravante<sup>5</sup>

<sup>5</sup> Department of Anaesthesiology, Local Health Authority of Caserta, Caserta, Italy. E-mail: francesco.gravante@unicampania.it

Antonella Paladini<sup>6</sup>

<sup>6</sup>Department of MESVA, University of L'Aquila, L'Aquila, Italy. Email:  
antonella.paladini@cc.uniqaq.it

Daniela D'Angelo<sup>7</sup>

<sup>7</sup> Italian Center of Excellence for Nursing Scholarship, Istituto Superiore di Sanità, Rome,  
Italy. E-mail: daniela.dangelo@iss.it

Laura Iacorossi<sup>8</sup>

<sup>8</sup>Department of Nursing & Health Professions, National Cancer Institute Regina Elena,  
Rome, Italy. E-mail: laura.iacorossi@gmail.com

Cristina Martella<sup>9</sup>

<sup>9</sup>Hospital Committees, IRCCS Santa Lucia, Rome Italy. E-mail: cristinamartella@virgilio.it

Rosaria Alvaro<sup>10</sup>

<sup>10</sup>Department of Biomedicine and Prevention, University of Rome Tor Vergata, Rome,  
Italy. E-mail: rosaria.alvaro@gmail.com

Dhurata Ivziku<sup>11</sup>

<sup>11</sup>Department of Nursing Innovation and Development, Campus Bio-Medico University of  
Rome, Italy. E-mail: d.ivziku@unicampus.it.

Nicola Veronese<sup>1</sup>

<sup>1</sup>Department of Health Promotion Science, Maternal and Infant Care, Internal Medicine,  
and Medical Specialities (PROMISE), University of Palermo, Palermo, Italy.

Mario Barbagallo<sup>1</sup>

<sup>1</sup> Department of Health Promotion Science, Maternal and Infant Care, Internal Medicine, and Medical Specialities (PROMISE), University of Palermo, Palermo, Italy.

Anna Marchetti <sup>12</sup>

<sup>12</sup> Research Unit of Nursing Sciences, Campus Bio-Medico University of Rome, Italy. E-mail: a.marchetti@unicampus.it.

Paolo Notaro <sup>13</sup>

<sup>13</sup> Pain Medicine Unit, Department of Neuroscience, Territorial Socio-Health Agency Grande Ospedale Metropolitano Niguarda, Milan, Italy. E-mail: paolo.notaro@ospedaleniguarda.it

Irene Terrenato <sup>14</sup>

<sup>14</sup> Biostatistics and Bioinformatic Unit, National Cancer Institute Regina Elena, Regina Elena, Rome, Italy. E-mail: irene.terrenato@ifo.it

Gianfranco Tarsitani <sup>15</sup>

<sup>15</sup> Public Health and Infectious Diseases Department, Sapienza University of Rome, Rome, Italy. E-mail: gianfranco.tarsitani@uniroma1.it

<sup>16</sup> Maria Grazia De Marinis

<sup>16</sup> Research Unit Nursing Science, Campus Bio-Medico University, Rome, Italy. E-mail: m.demarinis@unicampus.it

### **CORRESPONDING AUTHOR**

Francesco Gravante, Local Health Authority of Caserta – San Giuseppe Moscati Hospital, Via Gramsci n° 8 Aversa (CE), 81031 E-mail: francesco.gravante@unicampania.it

**Supplementary Table. Description of pain treatment**

| Pharmacological treatments  |            | Interventional invasive treatments        |            | Complementary treatment                   |           |
|-----------------------------|------------|-------------------------------------------|------------|-------------------------------------------|-----------|
| Type                        | n (%)      | Type                                      | n (%)      | Type                                      | n (%)     |
| Opioids                     | 691 (43.0) | PFPI <sup>a</sup>                         | 389 (24.2) | Acupuncture                               | 132 (8.2) |
| Acetaminophen               | 186 (11.6) | Pulsed radiofrequency denervation         | 108 (6.7)  | Massage and physiotherapy                 | 43 (2.7)  |
| Strong opioids              | 460 (53.6) | Mesotherapy                               | 63 (3.9)   | Scrambler therapy and others <sup>c</sup> | 30 (1.9)  |
| Oxycodone-naloxone          | 166 (46.0) | Epidural infusion or infiltration         | 64 (4.0)   |                                           |           |
| Oxycodone                   | 89 (24.6)  | Intra-articular injection                 | 32 (2.0)   |                                           |           |
| Hydromorphone               | 79 (21.9)  | Block and denervation of the facet joints | 29 (1.8)   |                                           |           |
| Oxycodone-acetaminophen     | 45 (12.4)  | Hyaluronic acid and other <sup>b</sup>    | 22 (1.4)   |                                           |           |
| Fentanyl                    | 36 (10.0)  |                                           |            |                                           |           |
| Weak opioids                | 399 (46.4) |                                           |            |                                           |           |
| Tramadol                    | 224 (56.1) |                                           |            |                                           |           |
| Tapentadol                  | 83 (20.8)  |                                           |            |                                           |           |
| Paracetamol-codeine         | 33 (8.3)   |                                           |            |                                           |           |
| Adjuvants                   | 242 (15.1) |                                           |            |                                           |           |
| Anticonvulsants             | 145 (60.0) |                                           |            |                                           |           |
| Antidepressants             | 29 (12.0)  |                                           |            |                                           |           |
| Corticosteroids             | 13 (5.2)   |                                           |            |                                           |           |
| Benzodiazepines             | 6 (2.4)    |                                           |            |                                           |           |
| <b>Non-selective NSAIDs</b> |            | <b>n (%)</b>                              |            |                                           |           |
| Diclofenac                  | 50 (26.7)  |                                           |            |                                           |           |
| Ketoprofen                  | 40 (21.3)  |                                           |            |                                           |           |
| Ketorolac                   | 37 (20.0)  |                                           |            |                                           |           |
| Ibuprofen                   | 27 (14.7)  |                                           |            |                                           |           |
| <b>Selective NSAIDs</b>     |            | <b>n (%)</b>                              |            |                                           |           |
| Etoricoxib                  | 79 (51.0)  |                                           |            |                                           |           |
| Celecoxib                   | 37 (32.4)  |                                           |            |                                           |           |
| <b>Other molecules</b>      |            | <b>n (%)</b>                              |            |                                           |           |
| Palmitoylethanolamide       | 134 (8.4)  |                                           |            |                                           |           |
| Various substances          | 39 (2.4)   |                                           |            |                                           |           |

a: PFPI = Periradicular/foraminal/perinervous infiltrations

b: Other = trigger point injections, percutaneous discectomy, ozone therapy, etc.

c: Other = scar therapy, platelet gel, magnetotherapy, TENS, homoeopathy

d: alpha-lipoic acid, nice tile, tizanidine magnesium, arnica, condones, clonidine, cyanocobalamin

n=1,606, but a patient can be given more than one treatment for pain management, so the percentage sum of the totals is above 100%
